# Supplementary material for: Combined Omics Approaches Reveal Distinct Mechanisms of Resistance and/or Susceptibility in Sugar Beet Double Haploid Genotypes at Early Stages of Beet Curly Top Virus Infection
Source: MDPI journal article supplement (doi:10.3390/ijms241915013), 2023-10-09
Supplement: s1 [file s1]

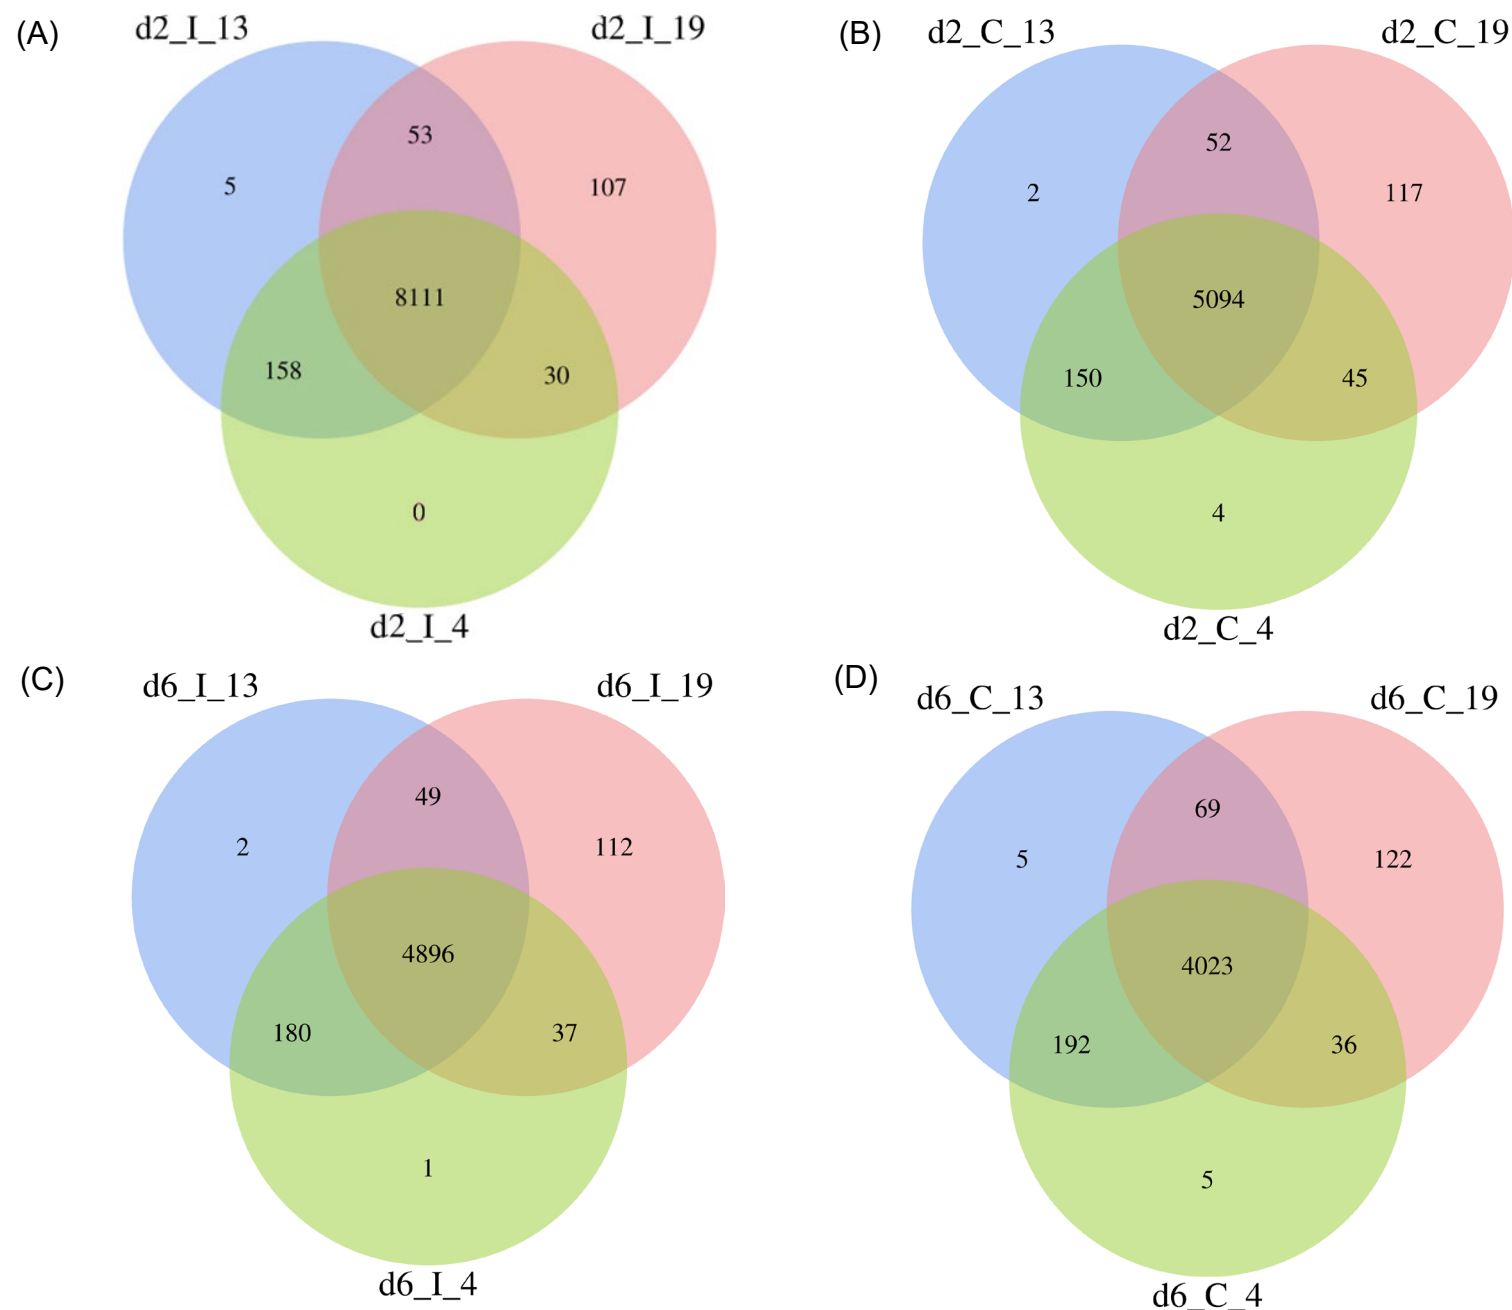

**Figure S1.** Venn diagram of differentially expressed (DE) sugar beet genes at 2 d and 6 d in the leaves of Beet curly top virus susceptible (Line 19; S) and resistant (Line 13 and Line 4; R) sugar beet lines infected and without virus infection. (A) 2 d infected (I), (B) 2 d uninfected control (C), (C) 6 d infected, and (D) 6 d uninfected control.

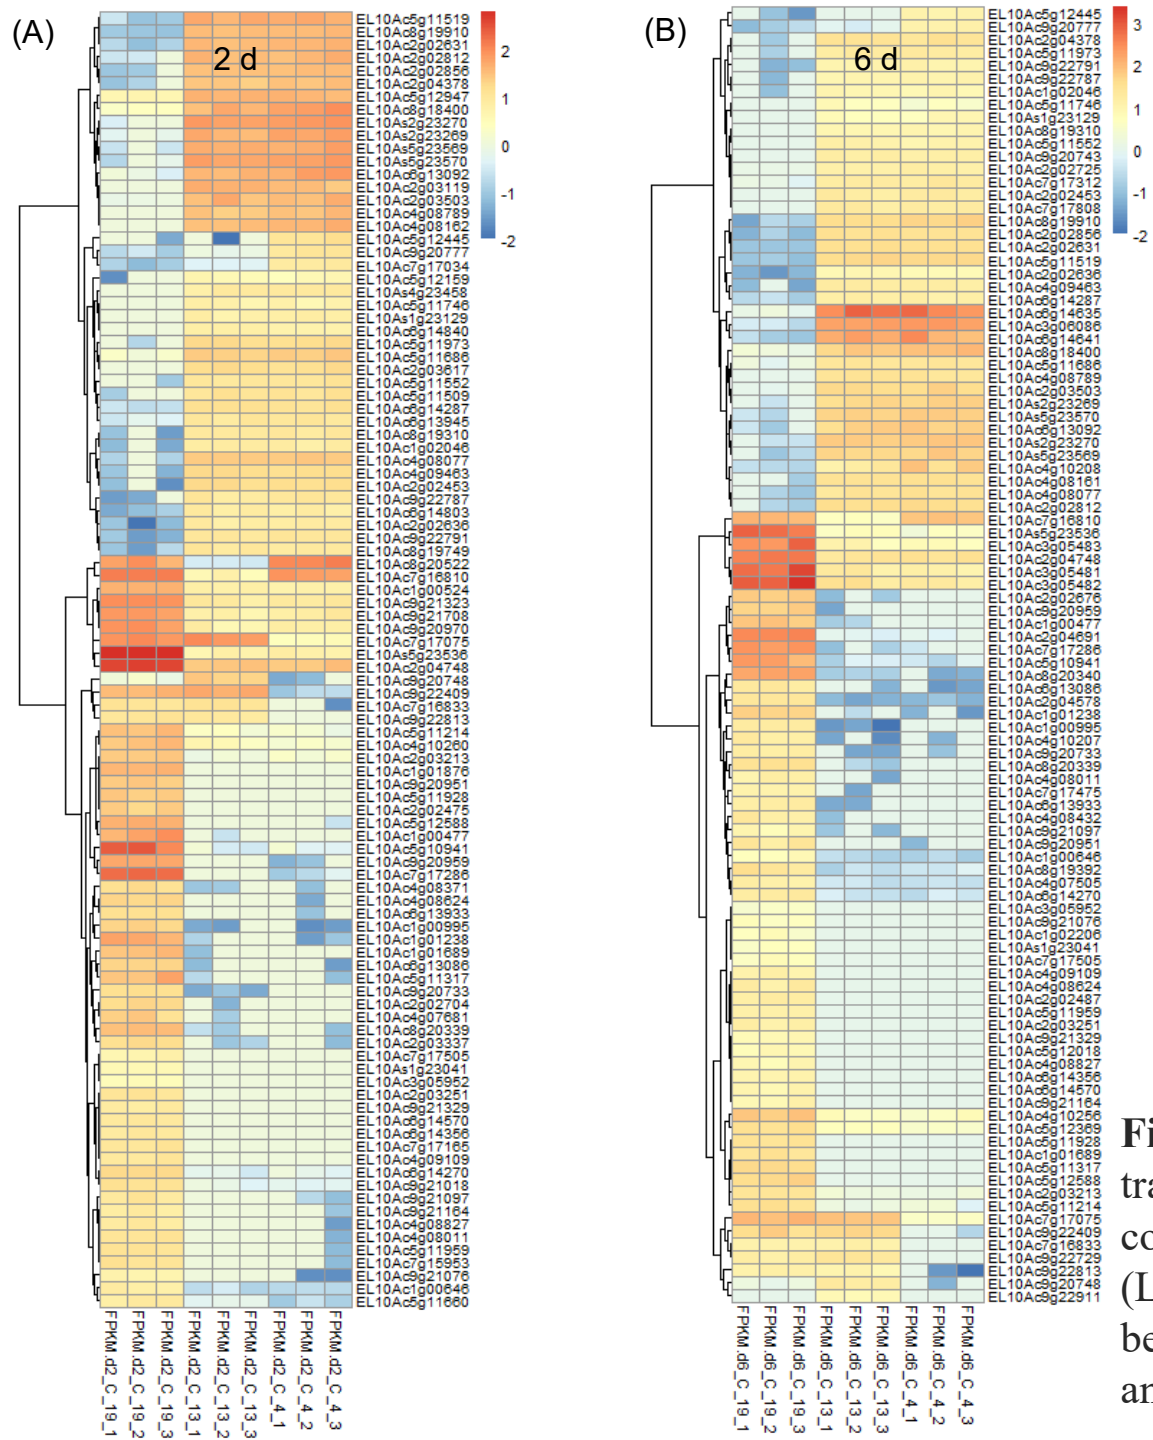

**Figure S2.** Heatmaps of differentially expressed (DE) transcripts at **(A)** 2 d control (C; uninfected), and **(B)** 6 d control (C; uninfected) in the leaves of BCTV susceptible (Line 19; S) and resistant (Line 13 and Line 4; R) sugar beet lines. Data are Mean  $\pm$  SE of 4–5 biological replicates and  $p \leq 0.01$  between ‘S’ and ‘R’ lines.

(A)

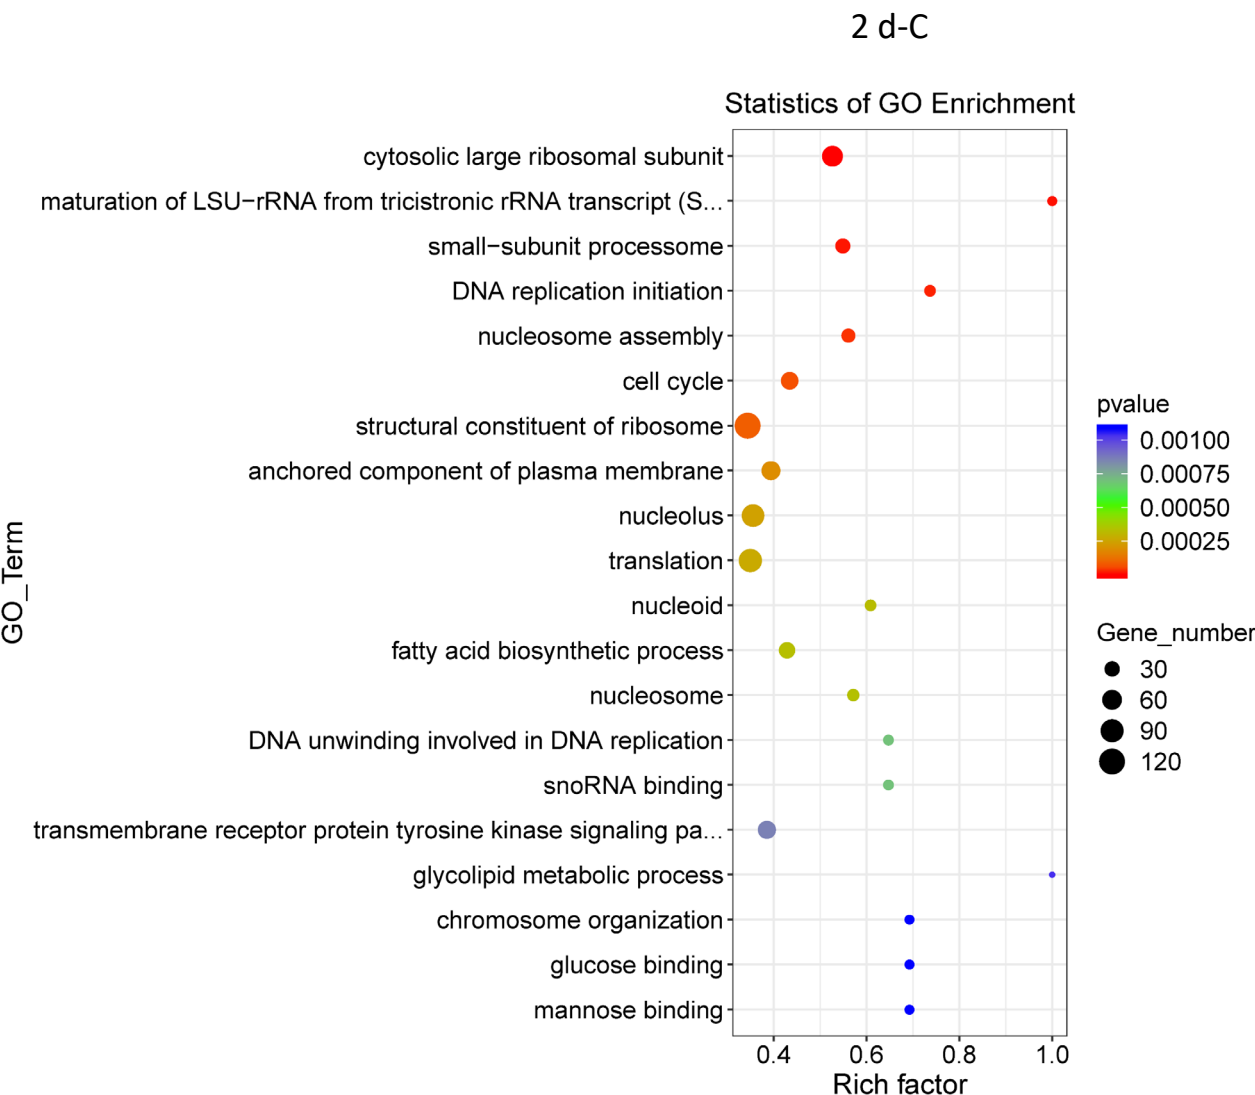

(B)

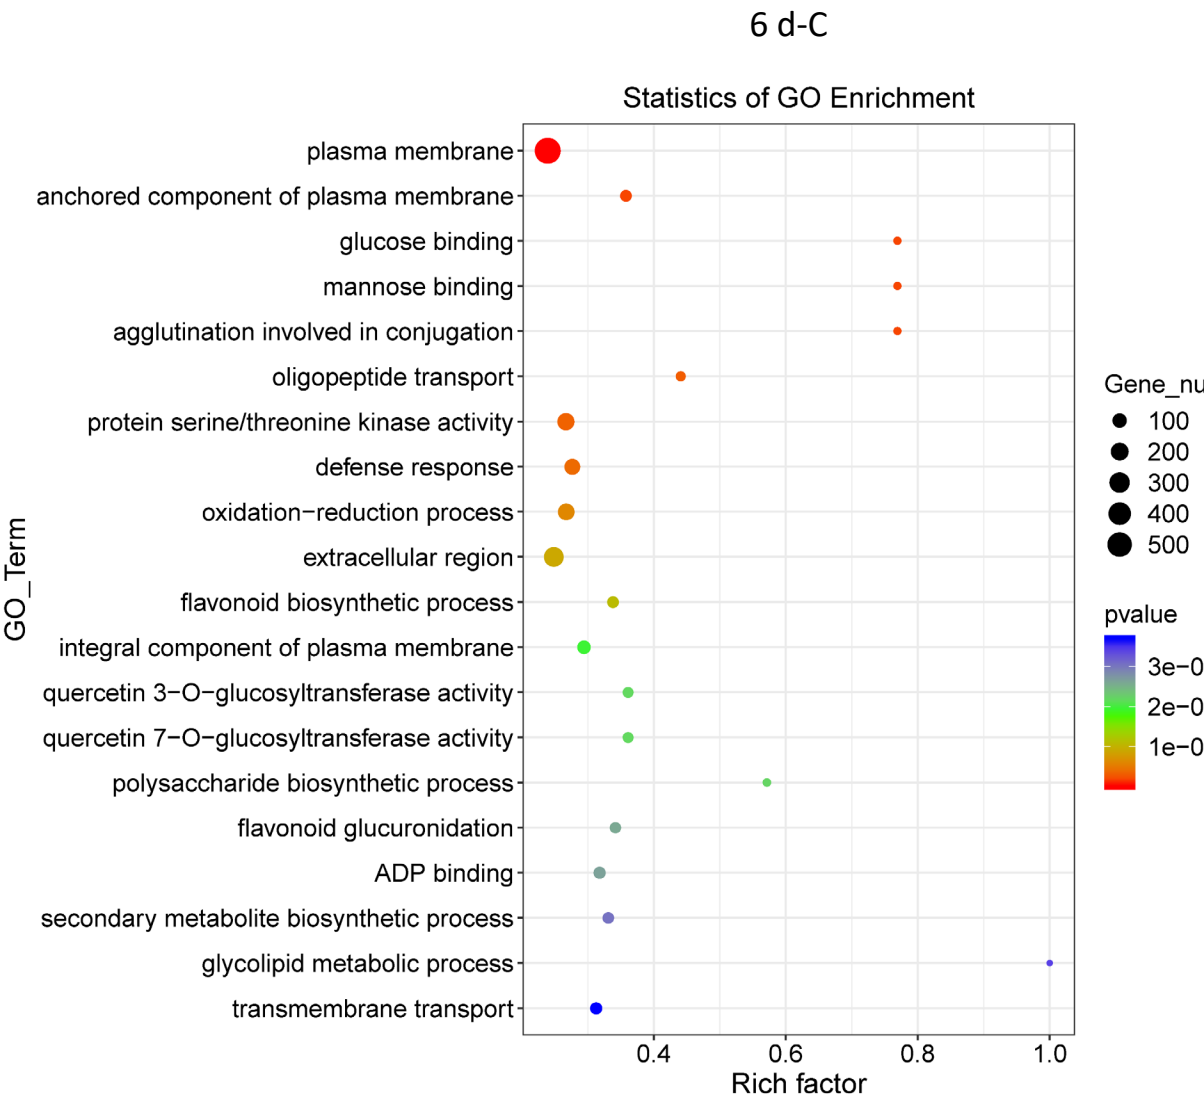

**Figure S3.** Gene ontology (GO) of differentially expressed sugar beet genes in the non-inoculated control (C) plants. (A) 2 d; and (B) 6 d. Data are mean of 3 biological replicates.

(A)

2 d-C

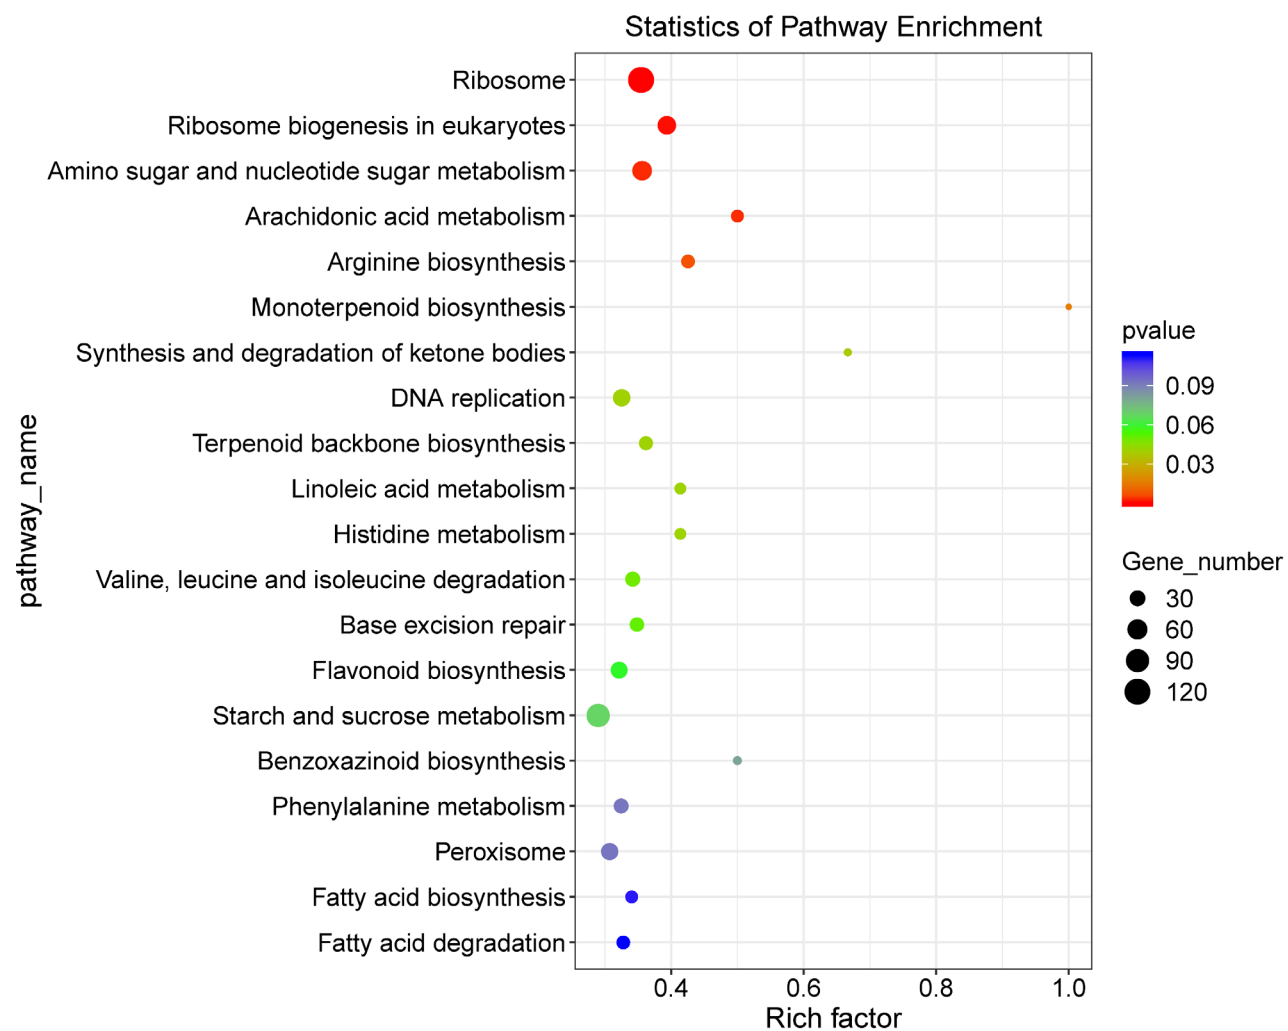

(B)

6 d-C

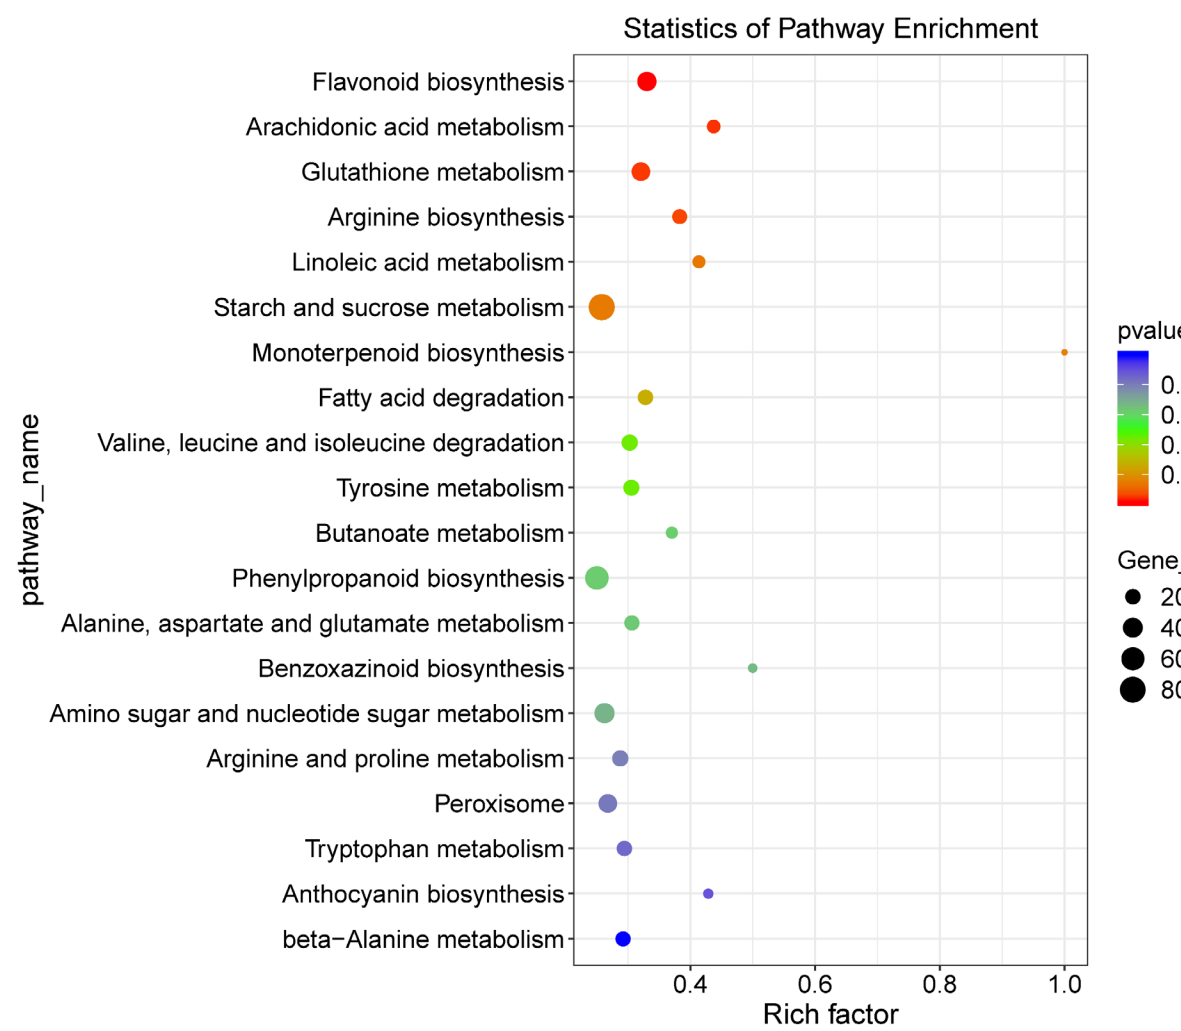

**Figure S4.** Pathway enrichment of differentially expressed sugar beet genes in the non-inoculated control (C) sugar beet plants. Kyoto Encyclopedia of Genes and Genomes (KEGG) enrichment of sugar beet genes in (A) 2 d, and (B) 6 d samples. Data are mean of 4-5 biological replicates.

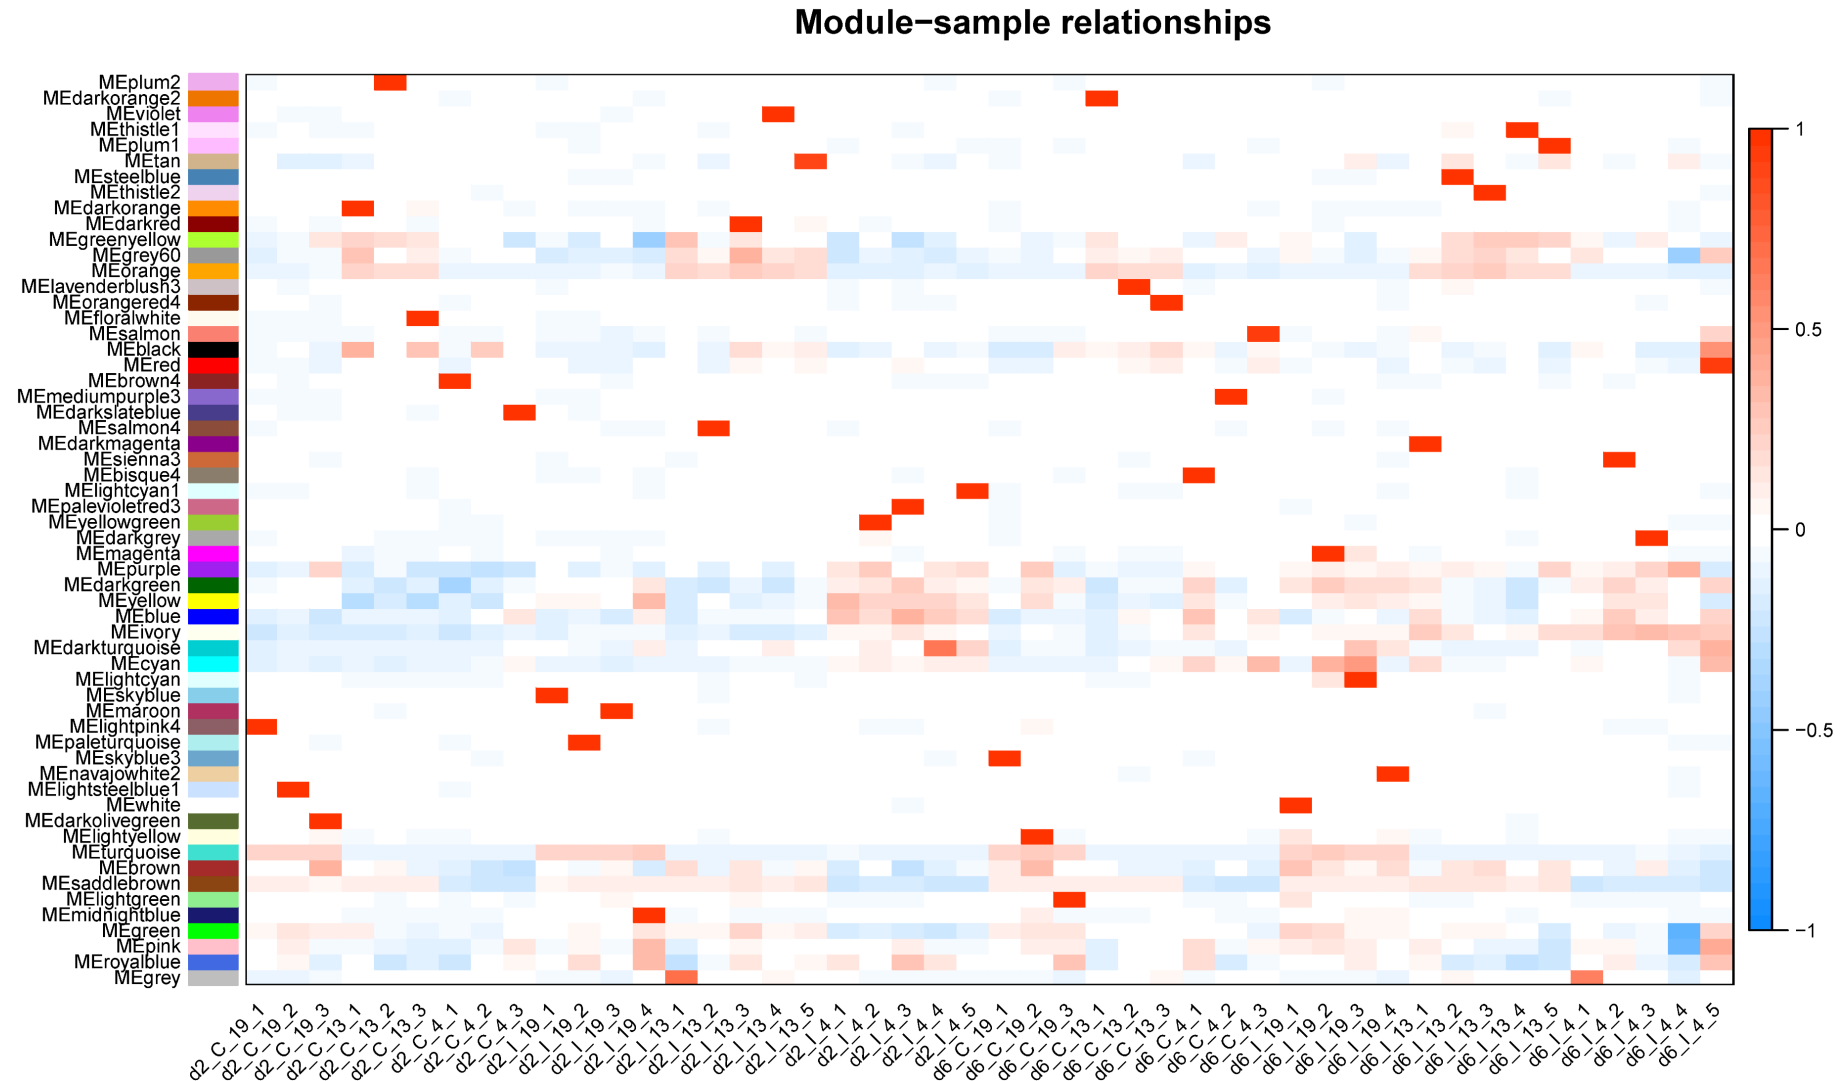

**Figure S5.** Weighted gene co-expression network analysis (WGCNA) of sugar beet genes in the leaves infected with (I) or without (C) Beet curly top virus (BCTV), show distinct clustering pattern (module-sample relationship) in the BCTV susceptible (Line 19; S) and resistant (Line 13 and Line 4) sugar beet lines.

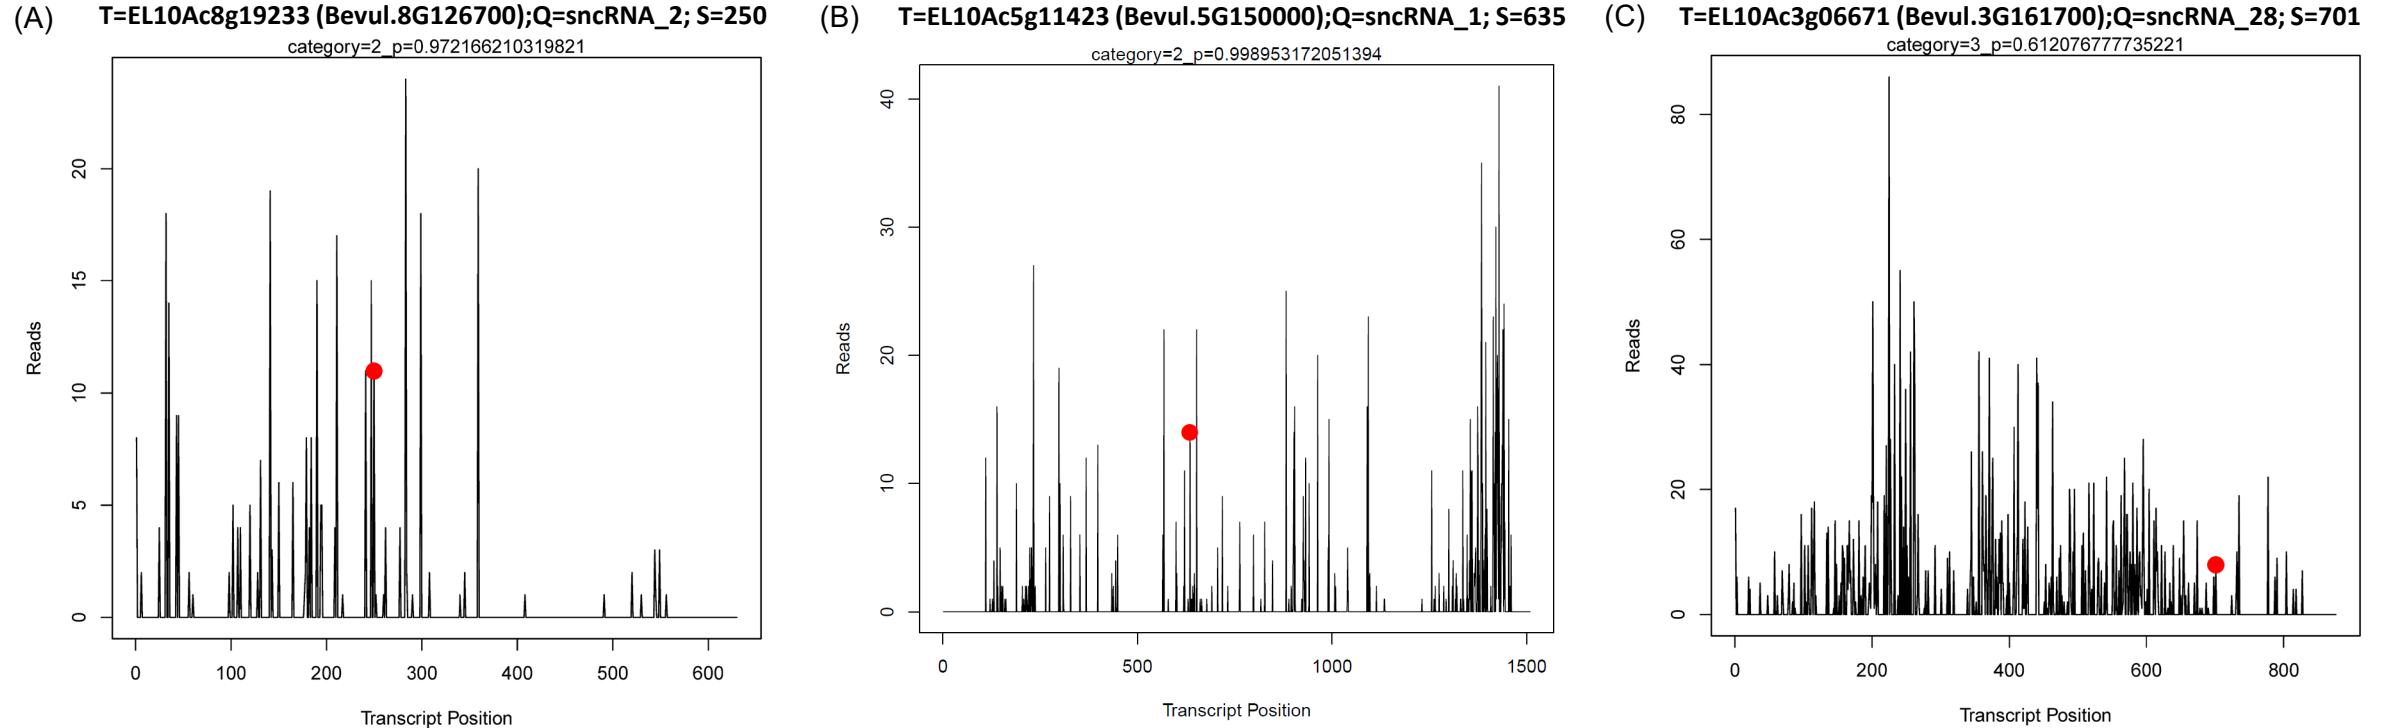

**Figure S6.** Target plot (t-plots) of Beet curly top virus (BCTV) derived representative small non-coding RNA (sncRNA) targets in different categories confirmed by degradome sequencing of the susceptible sugar beet Line 19 at 6 days post inoculation (dpi) leaf samples. (A) sncRNA\_2, (B) sncRNA\_1, and (C) sncRNA\_28. The red dots denote putative cleavage site as predicted by the 'CleaveLand' pipeline [55]; T: sugar beet target transcript, Q: query BCTV sncRNA., S: nucleotide site of the cleavage.

(A)

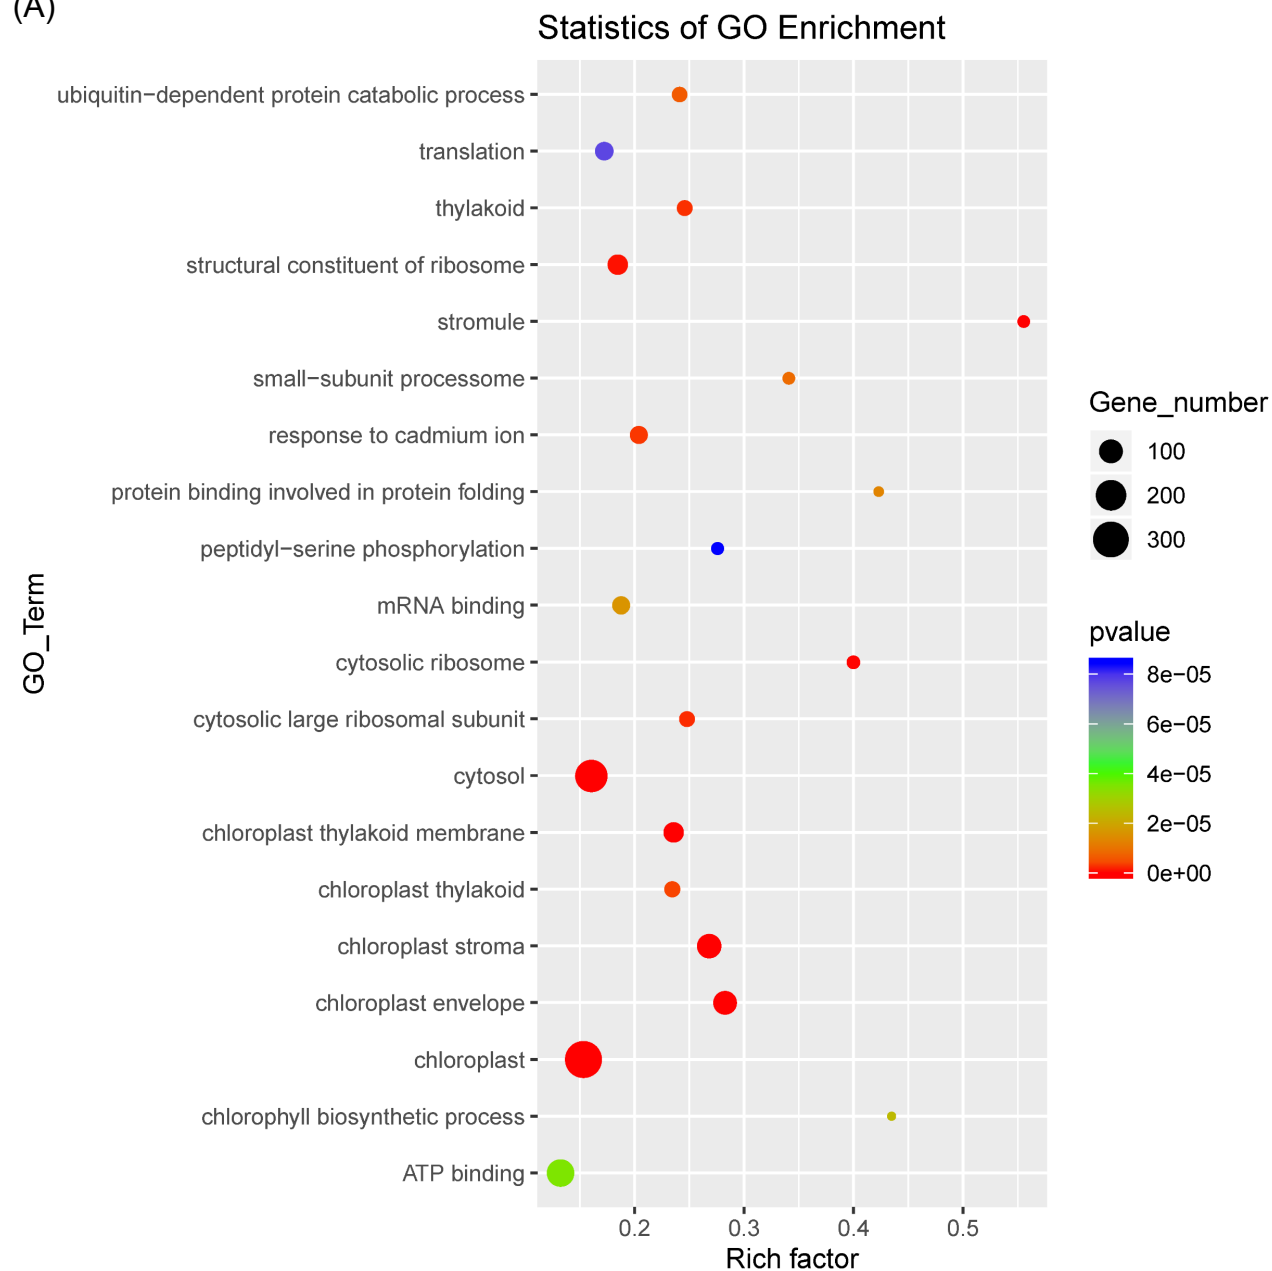

(B)

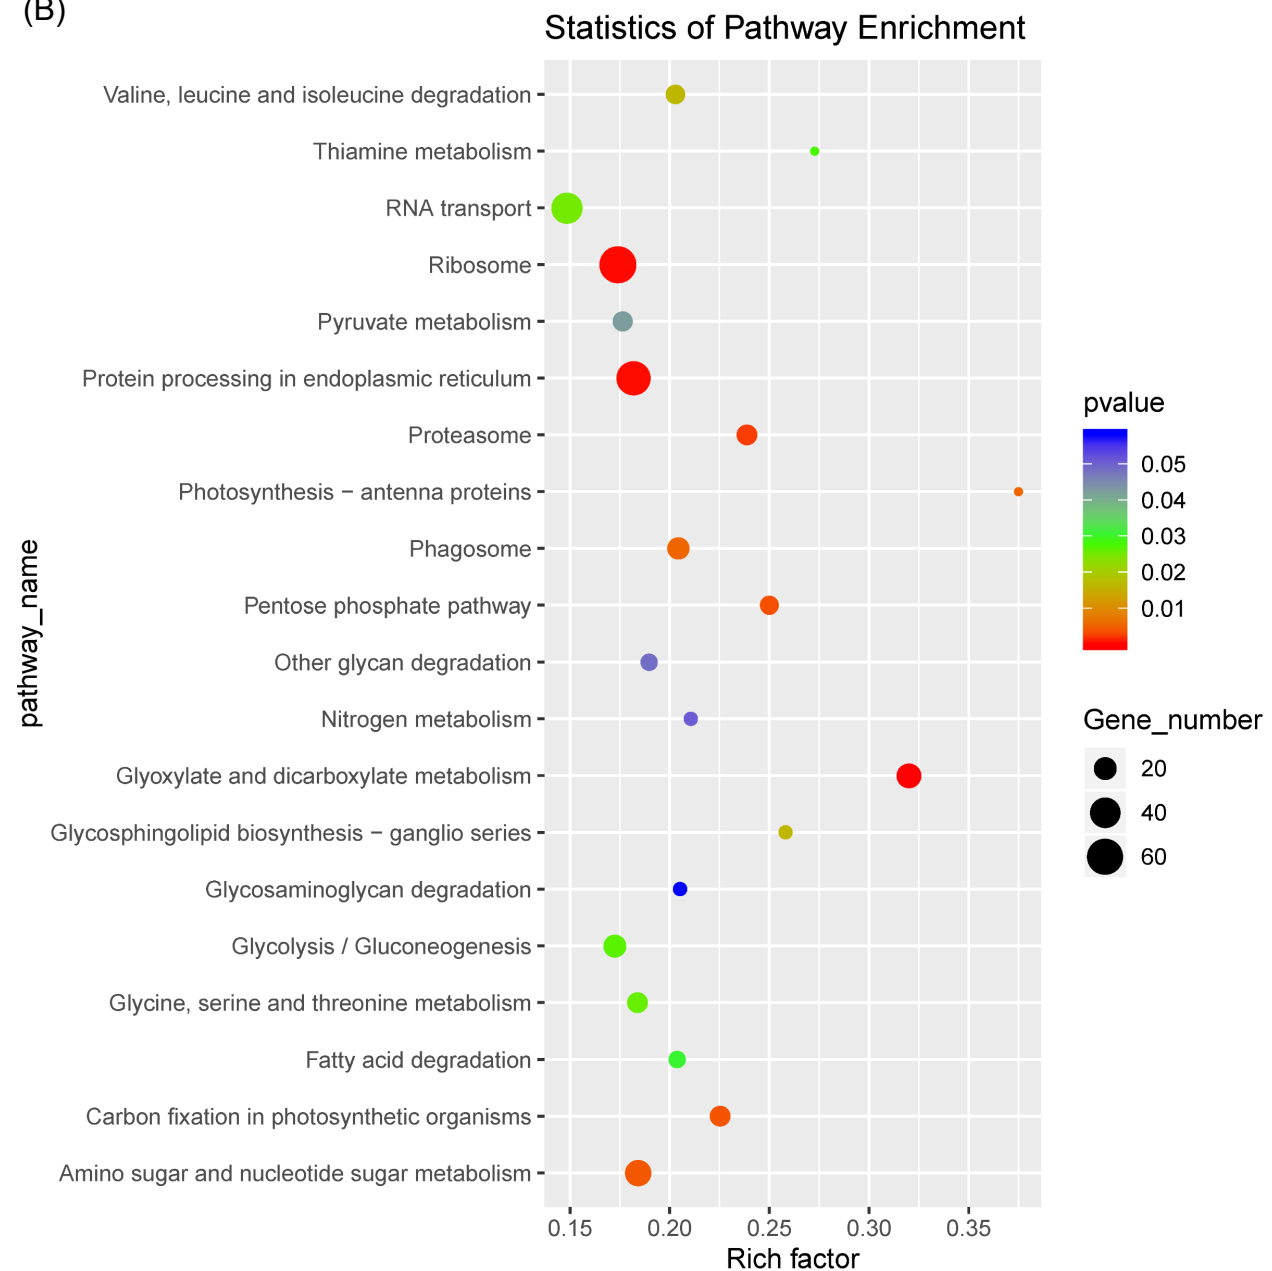

**Figure S7.** BCTV derived sncRNA target enrichment (based on degradome analysis) in the susceptible sugar beet Line 19 at 6 days post inoculation (dpi) samples. (A) Gene ontology (GO) enrichment, and (B) pathway enrichment.



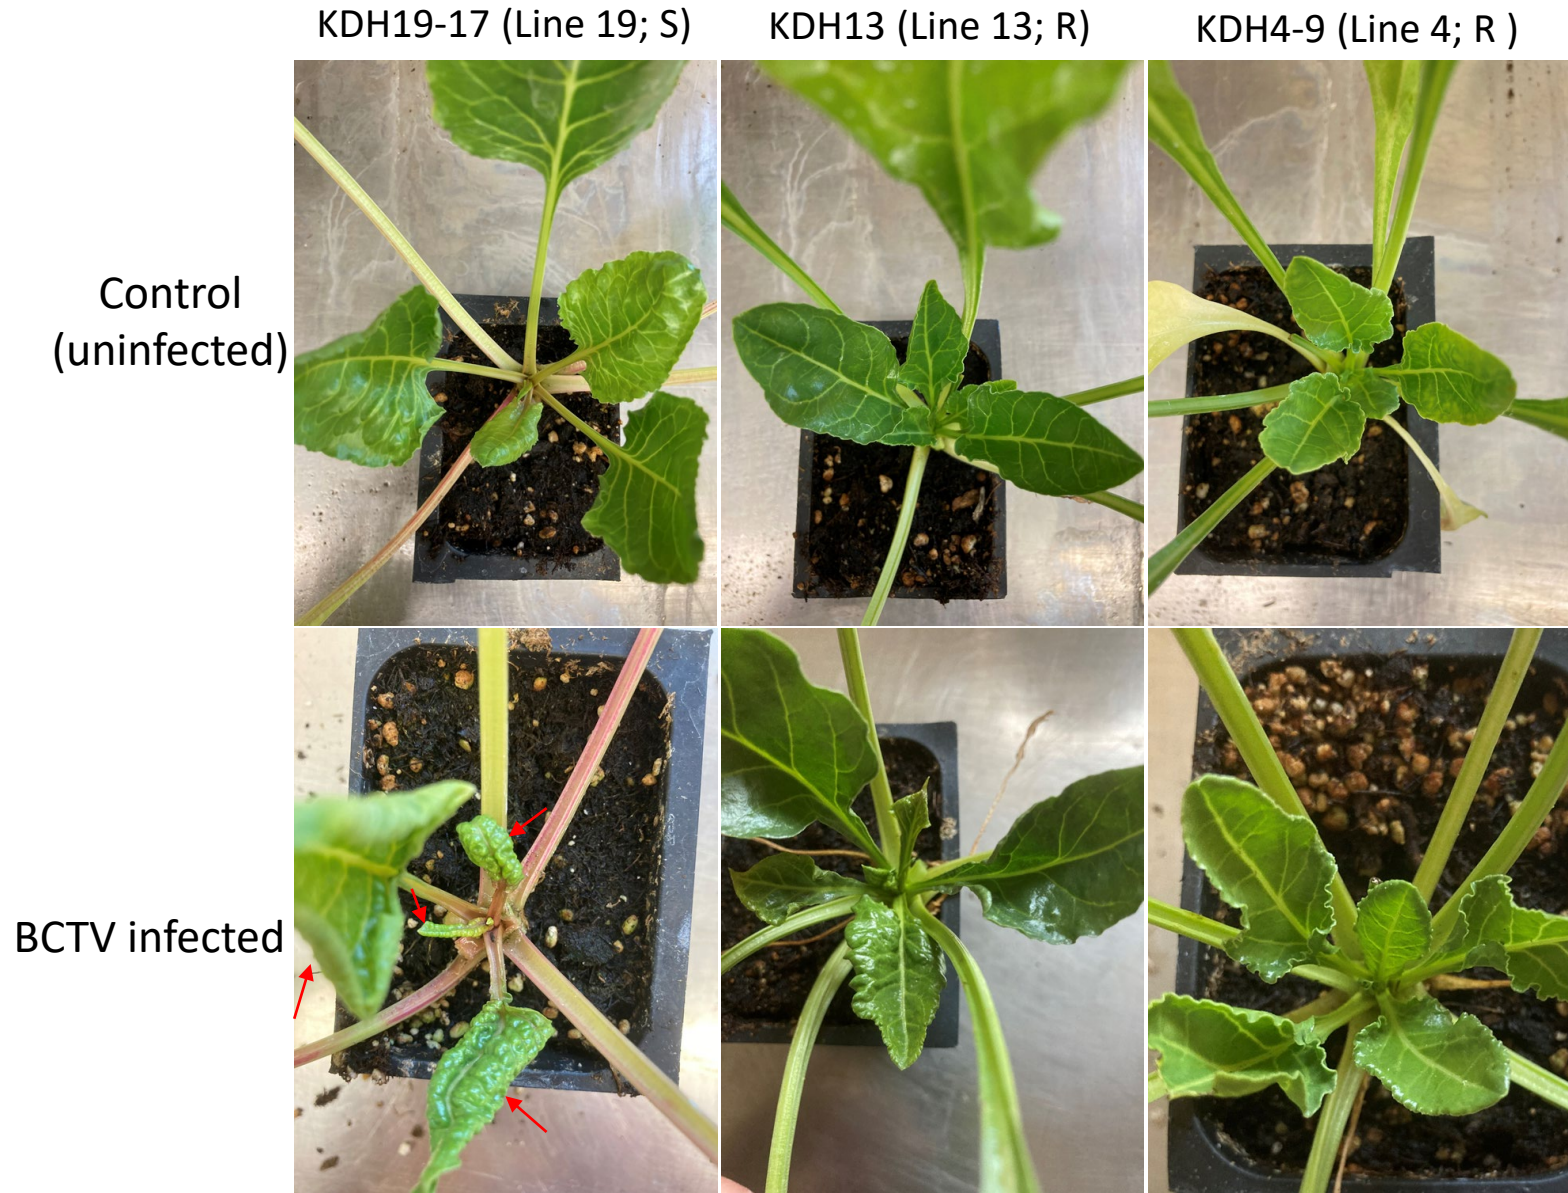

**Figure S8.** Disease symptoms (leaf curling and swelling) in the apical leaves (pointed by red arrows) of sugar beet genotypes at 3 weeks post inoculation (wpi). The upper panel shows phenotype of uninfected plants [susceptible (S); resistant (R)].



## Hypothesis:

Transcriptional regulation, specialized metabolites, and cross-kingdom RNAi play important role in sugar beet resistance against BCTV.

*In planta* BCTV infection (I) of 'R' and 'S' sugar beet plants using viruliferous BLH along with uninfected control (C) plants

BCTV: Beet curly top virus  
BLH: Beet leaf hopper

Resistant (R): KDH13 (Line 13),  
KDH4-9 (Line 4)  
Susceptible (S): KDH19-17 (Line 19)

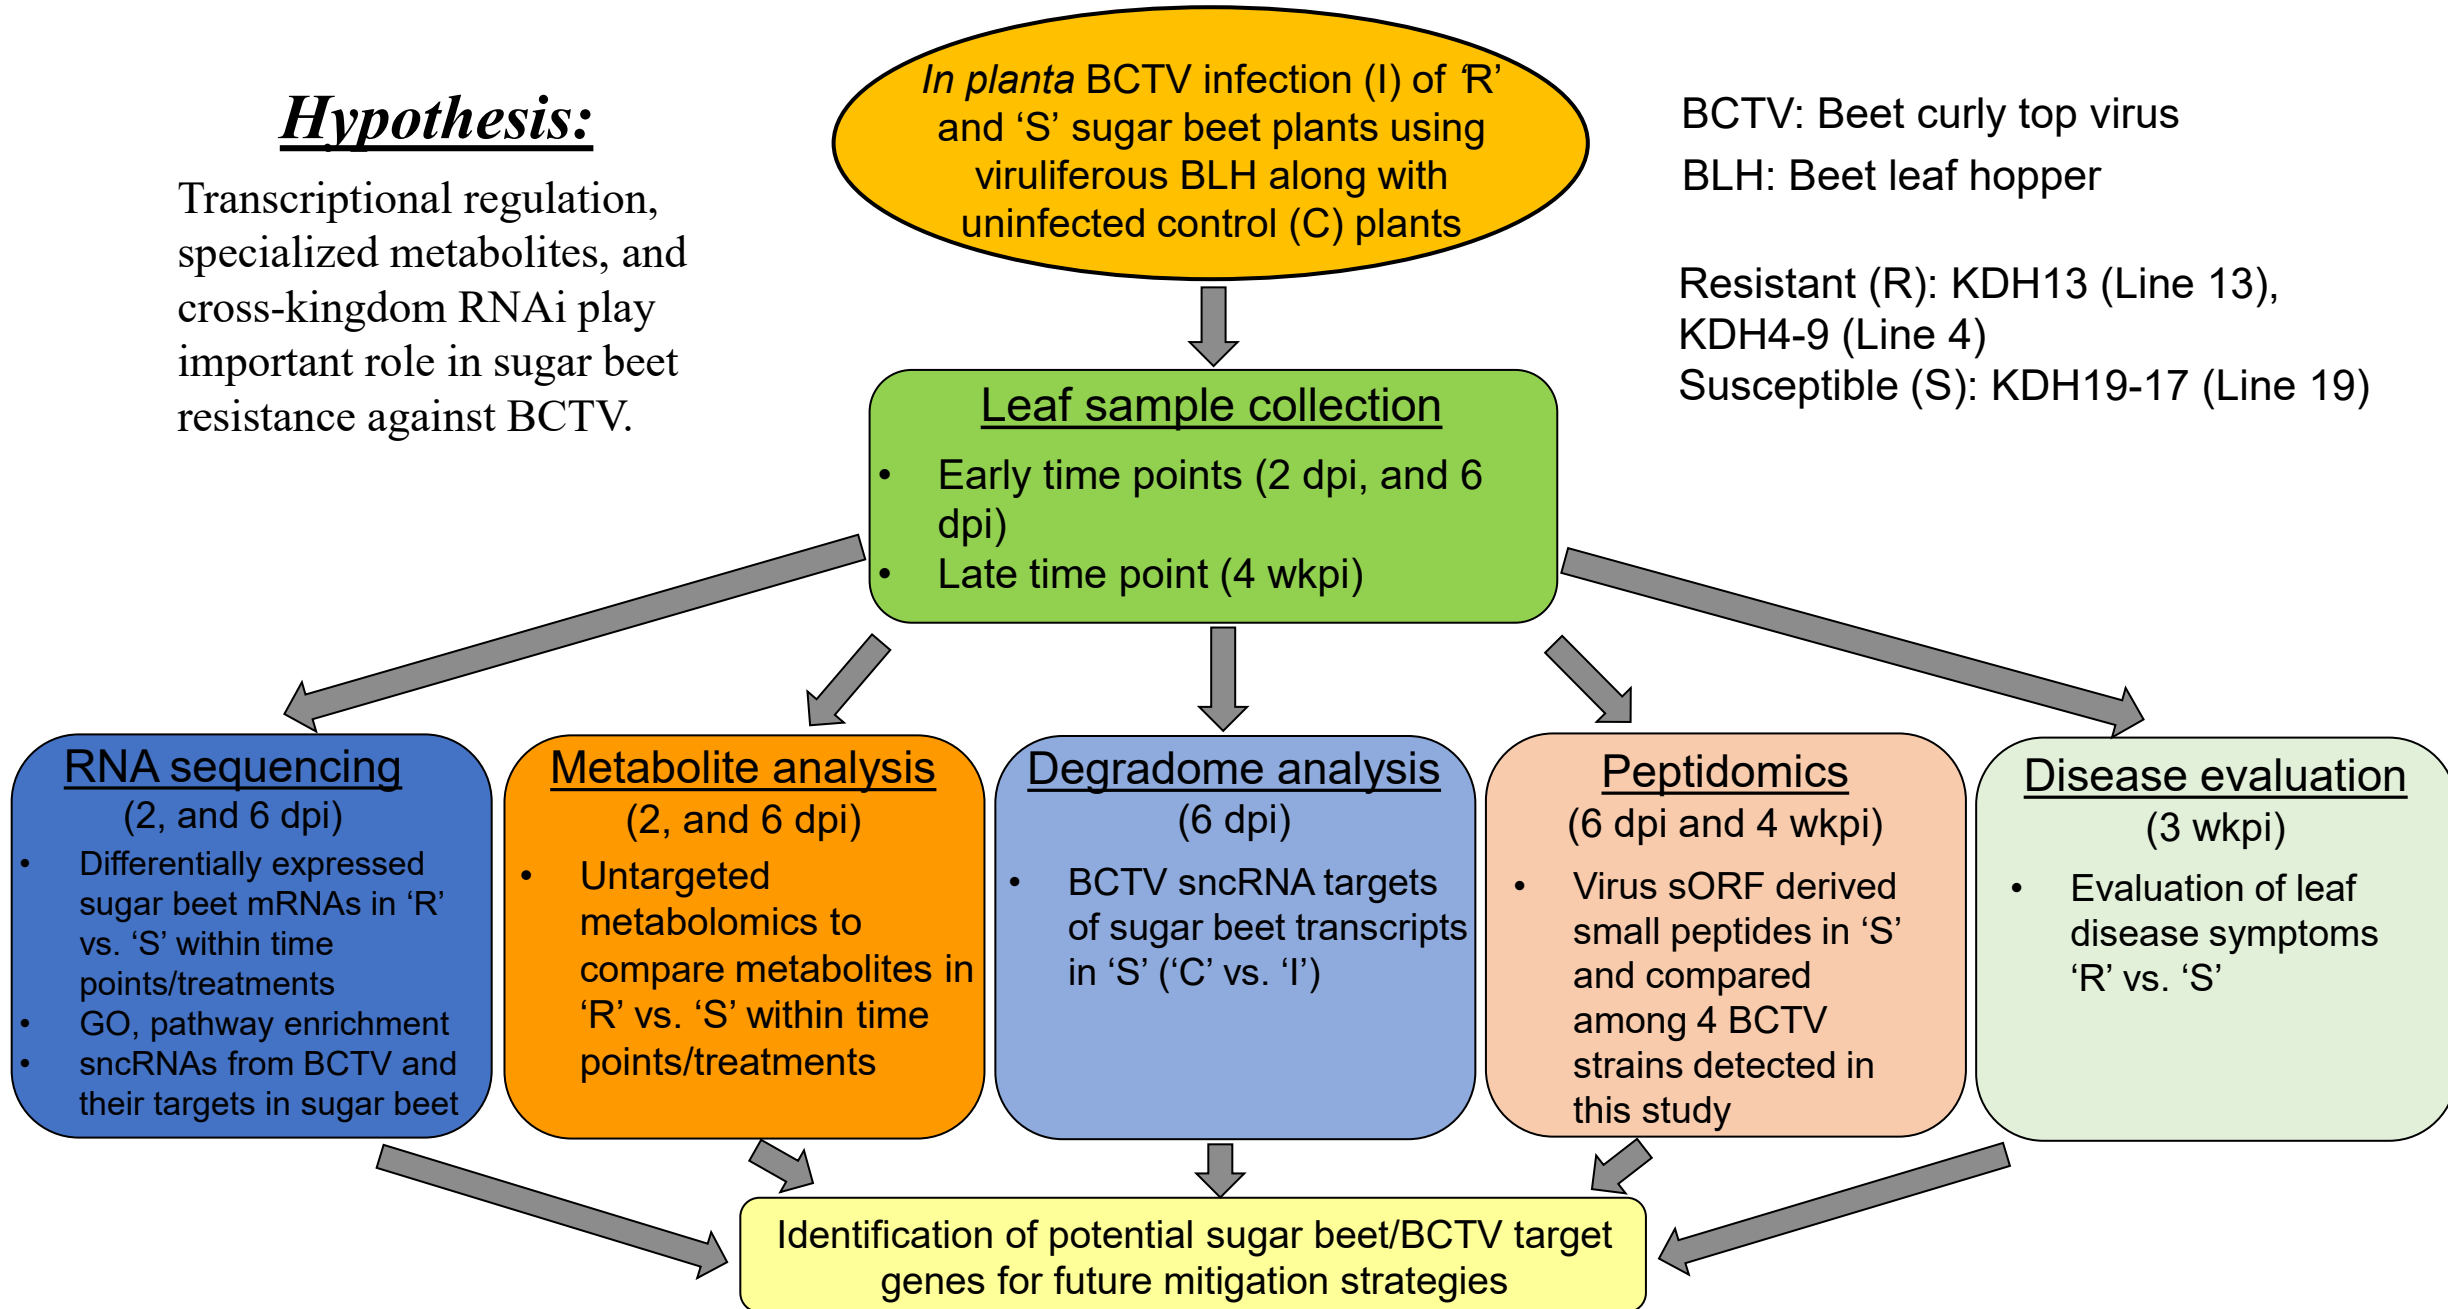

**Figure S9.** Experimental approach to delineate sugar beet resistance mechanisms against Beet curly top virus at early infection stages(dpi: days post infection; wkpi: weeks post infection; mRNA: messenger RNA; GO: gene ontology; sncRNA: small non-coding RNA; sORF: small open reading frame).
